# Supplementary material for: Translation of SARS-CoV-2 gRNA Is Extremely Efficient and Competitive despite a High Degree of Secondary Structures and the Presence of an uORF
Source: MDPI journal article supplement (doi:10.3390/v14071505), 2022-07-08
Supplement: s1 [file s1]

\_\_\_\_\_ → *Renilla Reniformis*  
 MDTSKVYDPE... - Globin  
 MEYSKVYDPE... - ORF-1ab  
 MEYSKVYDPE... - ORF-S / ORF-6  
 MDTSKVYDPE... - ORF-3a  
 MYTSKVYDPE... - ORF-E  
 MAYSKVYDPE... - ORF-M  
 MKYSKVYDPE... - ORF-7a / ORF-8  
 MIYSKVYDPE... - ORF-7b  
 MSYSKVYDPE... - ORF-N

**Figure S1.** N-terminal modification of the Renilla luciferase coding region. Sequence alignment of the beginning of the Renilla coding region from the SARS-CoV-2 5'UTRs construct used in the figure 3. As the nucleotide context of the AUG codon is conserved; this only induced a modification of the second amino acid (indicated in bold).

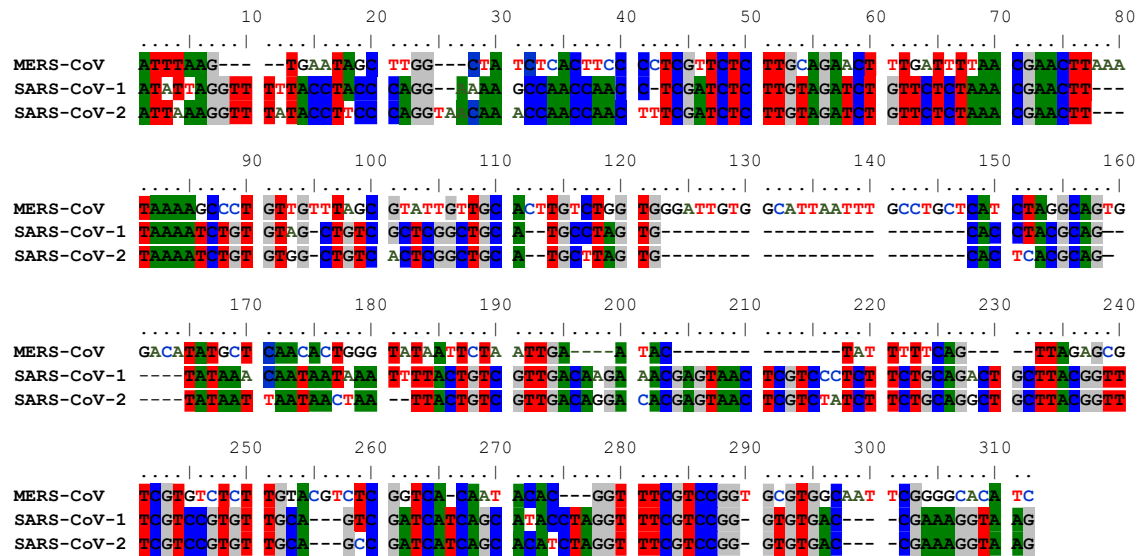

**Figure S2.** SARS CoV-1/2 and MERS CoV gRNA 5'UTRs conservation. The sequences of the 5'UTR from the SARS-CoV type 1 and 2 and MERS-CoV gRNA have been analyzed with a Multiple Sequence Comparison by Log- Expectation (MUSCLE) using the default parameters. Nucleotide identity has been highlighted in green for adenosine, blue for cytosine, red for tyrosine and grey for guanosine.

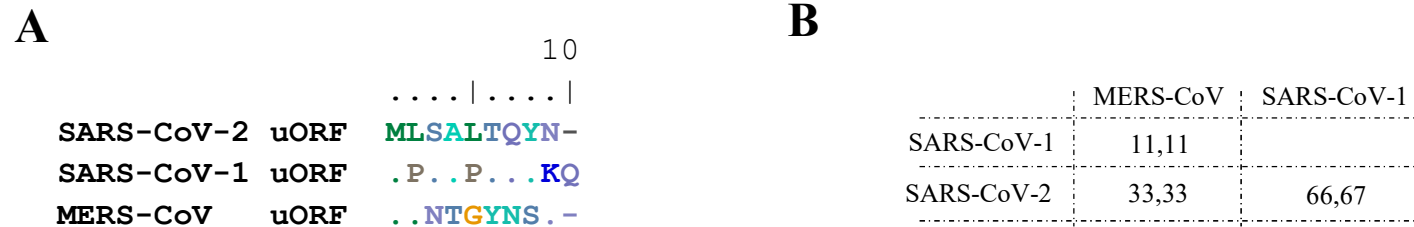

**Figure S3.** 5'UTR<sup>ORF1ab</sup> uORFs conservation. **(A)** The sequence of the 5'UTR<sup>ORF1ab</sup> uORFs from SARS-CoV-1, SARS-CoV-2 and MERS-CoV were analyzed with a Multiple Sequence Comparison by Log- Expectation (MUSCLE) using the default parameters. **(B)** Percentage of identity between the uORFs from 5'UTRs of MERS-CoV, SARS-CoV-1 and SARS-CoV-2 gRNAs resulting from a MUSCLE alignment.

| Constructs                                                                                 | # PCR                       | 5'-3' Primers                                                                                                                           | Template                                                                                                                  |              |
|--------------------------------------------------------------------------------------------|-----------------------------|-----------------------------------------------------------------------------------------------------------------------------------------|---------------------------------------------------------------------------------------------------------------------------|--------------|
| pSARS-CoV-2<br>Leader_Renilla                                                              | PCR #1                      | ATCTCTTGTAGATCTGTTCTCTAAACGAACATGGATCCTACTTCGAAAGTTTATG                                                                                 | pGlo-Renilla                                                                                                              |              |
|                                                                                            |                             | AGATGTAAAGCTTGCATAAATGTTAT                                                                                                              |                                                                                                                           |              |
|                                                                                            | PCR #2                      | TAAGCAGGATCCTAATACGACTCACTATAGATTAAGGTTTATACCTTCCCAGGTAACAAACCAACCAACTTTCGATCTCTTGTAGATCTGTTCTCTAA<br>AGATGTAAAGCTTGCATAAATGTTAT        | PCR #1                                                                                                                    |              |
|                                                                                            |                             |                                                                                                                                         |                                                                                                                           |              |
| pSARS-CoV-2<br>5'UTR <sup>ORF1ab</sup><br>Renilla                                          | PCR #1                      | TTCGTCCTGTTTGCAGCCGATCATCAGCACATCTAGGTTTCGTCCGGGTGTGACCGAAAGGTAAGATGGATCCTACTTCGAAAGTTTATG<br>AGATGTAAAGCTTGCATAAATGTTAT                | pGlo-Renilla                                                                                                              |              |
|                                                                                            |                             | AAATTAATACTAATTACTGTCGTTGACAGGACACGAGTAACCTCGTCTATCTTCTGCAGGCTGCTTACGGTTTCGTCCGTGTTGCAGCCG<br>AGATGTAAAGCTTGCATAAATGTTAT                |                                                                                                                           | PCR #1       |
|                                                                                            | PCR #3                      | GTTCTCTAAACGAACTTTAAAAATCTGTGTGGCTGTCACTCGGCTGCATGCTTAGTGCACCTACGCAGTATAATTAATAACTAATTACTGTCGTTGACAG<br>AGATGTAAAGCTTGCATAAATGTTAT      | PCR #2                                                                                                                    |              |
|                                                                                            |                             | TAAGCAGAATTAGATCTATTAAAGGTTTATACCTTCCCAGGTAACAAACCAACCAACTTTCGATCTCTTGAGATCTGTTCTCTAAACGAACTTTAAAAATCTGTG<br>AGATGTAAAGCTTGCATAAATGTTAT |                                                                                                                           | PCR #3       |
|                                                                                            | PCR #4                      | TAAGCAGGATCCTAATACGACTCACTATAGGCTAGCATTAAAGGTTTATACCTTCCCAGG<br>AGATGTAAAGCTTGCATAAATGTTAT                                              | PCR #4                                                                                                                    |              |
|                                                                                            |                             |                                                                                                                                         |                                                                                                                           |              |
|                                                                                            |                             |                                                                                                                                         |                                                                                                                           |              |
| pSARS-CoV-1<br>Leader_Renilla                                                              | PCR #1                      | ATATTAGGTTTTTACCTACCCAGGAAAAGCCAAACCAACCTCGATCTCTTGAGATCTGTTCTCTAAACGAACATGGATCCTACTTCGAAAGTTTATG<br>AGATGTAAAGCTTGCATAAATGTTAT         | pGlo-Renilla                                                                                                              |              |
|                                                                                            |                             | TAAGCAGGATCCCTCGAGTAATACGACTCACTATAGATATTAGGTTTTTACCTACCCAGG<br>AGATGTAAAGCTTGCATAAATGTTAT                                              |                                                                                                                           | PCR #1       |
|                                                                                            |                             |                                                                                                                                         |                                                                                                                           |              |
| pSARS-CoV-1<br>5'UTR <sup>ORF1ab</sup><br>Renilla                                          | PCR #1                      | TGCTTACGGTTTCGTCCGTGTTGCAGTCGATCATCAGCATACCTAGGTTTCGTCCGGGTGTGACCGAAAGGTAAGATGGATCCTACTTCGAAAGTTTATG<br>AGATGTAAAGCTTGCATAAATGTTAT      | pGlo-Renilla                                                                                                              |              |
|                                                                                            |                             | ACCTACGCAGTATAAAACAATAATAAATTTTACTGTCGTTGACAAGAAACGAGTAACCTCGTCCCTCTTCTGCAGACTGCTTACGGTTTCGTCCGT<br>AGATGTAAAGCTTGCATAAATGTTAT          |                                                                                                                           | PCR #1       |
|                                                                                            | PCR #3                      | TCGATCTCTTGAGATCTGTTCTCTAAACGAACTTTAAAAATCTGTGTAGCTGTGCTCGGCTGCATGCCTAGTGCACCTACGCAGTATAAAACAATAATAA<br>AGATGTAAAGCTTGCATAAATGTTAT      | PCR #2                                                                                                                    |              |
|                                                                                            |                             | TAAGCAGGATCCCTCGAGTAATACGACTCACTATAGATATTAGGTTTTTACCTACCCAGGAAAAGCCAAACCAACCTCGATCTCTTGAGATCTGTTCT<br>AGATGTAAAGCTTGCATAAATGTTAT        |                                                                                                                           | PCR #3       |
|                                                                                            |                             |                                                                                                                                         |                                                                                                                           |              |
|                                                                                            | pMERS-CoV<br>Leader_Renilla | PCR #1                                                                                                                                  | ATTTAAGTGAATAGCTTGGCTATCTCACTTCCCCTCGTTCTCTTGAGAACTTTGATTTTAACGAACATGGATCCTACTTCGAAAGTTTATG<br>AGATGTAAAGCTTGCATAAATGTTAT | pGlo-Renilla |
| TAAGCAGGATCCCTCGAGTAATACGACTCACTATAGATTTAAGTGAATAGCTTGGCTATC<br>AGATGTAAAGCTTGCATAAATGTTAT |                             |                                                                                                                                         | PCR #1                                                                                                                    |              |
|                                                                                            |                             |                                                                                                                                         |                                                                                                                           |              |
| pMERS-CoV<br>5'UTR <sup>ORF1ab</sup><br>Renilla                                            | PCR #1                      | TAGAGCGTCGTGTCTCTTGACGTCTCGGTACACAATACACGGTTTCGTCCGGTGCGTGGCAATTCGGGGCACATCATGGATCCTACTTCGAAAGTTTATG<br>AGATGTAAAGCTTGCATAAATGTTAT      | pGlo-Renilla                                                                                                              |              |
|                                                                                            |                             | AATTTCCTGCTCATCTAGGCAGTGGACATATGCTCAACACTGGGTATAATTCTAATTGAATACTATTTTCAGTTAGAGCGTCGTGTCTCTTGTA<br>AGATGTAAAGCTTGCATAAATGTTAT            |                                                                                                                           | PCR #1       |
|                                                                                            | PCR #3                      | TAAAAGCCCTGTGTTTAGCGTATGTGCACTGTCTGGTGGGATGTGGCATTAAATTGCCTGCTCATCTAGGC<br>AGATGTAAAGCTTGCATAAATGTTAT                                   | PCR #2                                                                                                                    |              |
|                                                                                            |                             | TCACTTCCCCTCGTTCTCTTGACAGAACTTTGATTTTAAACGAACCTTAAATAAAAGCCCTGTGTTAGCG<br>AGATGTAAAGCTTGCATAAATGTTAT                                    |                                                                                                                           | PCR #3       |
|                                                                                            | PCR #4                      | TACGAAGGATCCTAATACGACTCACTATAGATTTAAGTGAATAGCTTGGCTATCTCACTTCCCCTCGTTCTCTTG<br>AGATGTAAAGCTTGCATAAATGTTAT                               | PCR #4                                                                                                                    |              |
|                                                                                            |                             |                                                                                                                                         |                                                                                                                           |              |

**Table S1.** List of primers used for the cloning of the SARS-CoV 1/2 and MERS-CoV leader and 5'UTR<sup>ORF1ab</sup>.

| Constructs                              | # PCR  | 5'-3' Primers                                                                                                                         | Template     |
|-----------------------------------------|--------|---------------------------------------------------------------------------------------------------------------------------------------|--------------|
| pSARS-CoV-2<br>5'UTR-ORF-1ab<br>Renilla | PCR #1 | TTCTGTCGGTGTTCAGCCGATCATCAGCACATCTAGGTTTCGTCGGGTGTGACCGAAAGGTAAGATGGAGACTTCGAAAGTTTATGATCCAG<br>TTCTCTGATATCTTCAGTTTGTGTC             | pGlo-Renilla |
|                                         | PCR #2 | AATTAATAACTAATTACTGTCTGACAGGACACGAGTAACCTGCTATCTTCTGCAGGTGCTTACGGTTTCGTCCGTGTTCAGCCG<br>TTCTCTGATATCTTCAGTTTGTGTC                     | PCR #1       |
|                                         | PCR #3 | GTTCTCTAAACGAACTTTAAAACTGTGTGGCTGTCACTCGGCTGCATGCTTAGTGCACTCACGCAGTATAATTAATAACTAATTACTGTCTGACAG<br>TTCTCTGATATCTTCAGTTTGTGTC         | PCR #2       |
|                                         | PCR #4 | TAAGCAGAATTCAGATCTAATAAAGGTTTATACCTTCCCAGGTAACAAACCAACCAACTTTCGATCTCTTGTAGATCTGTTCTCTAAACGAACTTAAAACTGTG<br>TTCTCTGATATCTTCAGTTTGTGTC | PCR #3       |
|                                         | PCR #5 | TAAGCAGGATCCTAATACGACTCACTATAGATTAAGGTTTATACCTTCCCAGGTAACAAACCAACCAACTTTCGATCTCTGTAGATCTGTTCTCTAA<br>TTCTCTGATATCTTCAGTTTGTGTC        | PCR #4       |
|                                         |        |                                                                                                                                       |              |
| pSARS-CoV-2<br>5'UTR-ORF-S<br>Renilla   | PCR #1 | TGTAGATCTGTTCTCTAAACGAACAATGTTTACTTCGAAAGTTTATGATCCAG<br>TTCTCTGATATCTTCAGTTTGTGTC                                                    | pGlo-Renilla |
|                                         | PCR #2 | TAAGCAGGATCCTAATACGACTCACTATAGATTAAGGTTTATACCTTCCCAGGTAACAAACCAACCAACTTTCGATCTCTGTAGATCTGTTCTCTAAACGAAC<br>TTCTCTGATATCTTCAGTTTGTGTC  | PCR #1       |
|                                         |        |                                                                                                                                       |              |
| pSARS-CoV-2<br>5'UTR-ORF-3a<br>Renilla  | PCR #1 | TGTAGATCTGTTCTCTAAACGAACCTATGGATACTTCGAAAGTTTATGATCCAG<br>TTCTCTGATATCTTCAGTTTGTGTC                                                   | pGlo-Renilla |
|                                         | PCR #2 | TAAGCAGGATCCTAATACGACTCACTATAGATTAAGGTTTATACCTTCCCAGGTAACAAACCAACCAACTTTCGATCTCTGTAGATCTGTTCTCTAAACGAAC<br>TTCTCTGATATCTTCAGTTTGTGTC  | PCR #1       |
|                                         |        |                                                                                                                                       |              |
| pSARS-CoV-2<br>5'UTR-ORF-E<br>Renilla   | PCR #1 | TGTAGATCTGTTCTCTAAACGAACCTATGTACACTTCGAAAGTTTATGATCCAG<br>TTCTCTGATATCTTCAGTTTGTGTC                                                   | pGlo-Renilla |
|                                         | PCR #2 | TAAGCAGGATCCTAATACGACTCACTATAGATTAAGGTTTATACCTTCCCAGGTAACAAACCAACCAACTTTCGATCTCTGTAGATCTGTTCTCTAAACGAAC<br>TTCTCTGATATCTTCAGTTTGTGTC  | PCR #1       |
|                                         |        |                                                                                                                                       |              |
| pSARS-CoV-2<br>5'UTR-ORF-M<br>Renilla   | PCR #1 | TGTAGATCTGTTCTCTAAACGAACCTAATATTATATTAGTTTTCTGTTTGGAACTTTAATTTTAGCCATGGCAACTTCGAAAGTTTATGATCCAG<br>TTCTCTGATATCTTCAGTTTGTGTC          | pGlo-Renilla |
|                                         | PCR #2 | TAAGCAGGATCCTAATACGACTCACTATAGATTAAGGTTTATACCTTCCCAGGTAACAAACCAACCAACTTTCGATCTCTGTAGATCTGTTCTCTAAACGAAC<br>TTCTCTGATATCTTCAGTTTGTGTC  | PCR #1       |
|                                         |        |                                                                                                                                       |              |
| pSARS-CoV-2<br>5'UTR-ORF-6<br>Renilla   | PCR #1 | GACCATTCCAGTAGCAGTGACAATATGCTTTGCTTGTACAGTAAGTGACAACAGATGTTTACTTCGAAAGTTTATGATCCAG<br>TTCTCTGATATCTTCAGTTTGTGTC                       | pGlo-Renilla |
|                                         | PCR #2 | CAGGTGACTCAGGTTTGTCTGCATACAGTCGCTACAGGATTGGCAACTATAAATTAACACAGACCATTCAGTAGCAGTG<br>TTCTCTGATATCTTCAGTTTGTGTC                          | PCR #1       |
|                                         | PCR #3 | TGTAGATCTGTTCTCTAAACGAACGCTTCTTATTACAAATGGGAGCTTCGCAGCGTGTAGCAGGTGACTCAGGTTTTC<br>TTCTCTGATATCTTCAGTTTGTGTC                           | PCR #2       |
|                                         | PCR #4 | TAAGCAGGATCCTAATACGACTCACTATAGATTAAGGTTTATACCTTCCCAGGTAACAAACCAACCAACTTTCGATCTCTGTAGATCTGTTCTCTAAACGAAC<br>TTCTCTGATATCTTCAGTTTGTGTC  | PCR #3       |
|                                         |        |                                                                                                                                       |              |
| pSARS-CoV-2<br>5'UTR-ORF-7a<br>Renilla  | PCR #1 | TGTAGATCTGTTCTCTAAACGAACATGAAACTTCGAAAGTTTATGATCCAG<br>TTCTCTGATATCTTCAGTTTGTGTC                                                      | pGlo-Renilla |
|                                         | PCR #2 | TAAGCAGGATCCTAATACGACTCACTATAGATTAAGGTTTATACCTTCCCAGGTAACAAACCAACCAACTTTCGATCTCTGTAGATCTGTTCTCTAAACGAAC<br>TTCTCTGATATCTTCAGTTTGTGTC  | PCR #1       |
|                                         |        |                                                                                                                                       |              |
| pSARS-CoV-2<br>5'UTR-ORF-7b<br>Renilla  | PCR #1 | TTATTGTTGCGGCAATAGTGTTTATAACACTTTGCTTCACACTCAAAAGAAAGACAGAATGATTACTTCGAAAGTTTATGATCCAG<br>TTCTCTGATATCTTCAGTTTGTGTC                   | pGlo-Renilla |
|                                         | PCR #2 | TGTAGATCTGTTCTCTAAAAGAACCTTACTCTCCAATTTTCTTATTGTGTCGGCAATAGTG<br>TTCTCTGATATCTTCAGTTTGTGTC                                            | PCR #1       |
|                                         | PCR #3 | TAAGCAGGATCCTAATACGACTCACTATAGATTAAGGTTTATACCTTCCCAGGTAACAAACCAACCAACTTTCGATCTCTGTAGATCTGTTCTCTAAACGAAC<br>TTCTCTGATATCTTCAGTTTGTGTC  | PCR #2       |
|                                         |        |                                                                                                                                       |              |
| pSARS-CoV-2<br>5'UTR-ORF-8<br>Renilla   | PCR #1 | TGTAGATCTGTTCTCTAAACGAACATGAAACTTCGAAAGTTTATGATCCAG<br>TTCTCTGATATCTTCAGTTTGTGTC                                                      | pGlo-Renilla |
|                                         | PCR #2 | TAAGCAGGATCCTAATACGACTCACTATAGATTAAGGTTTATACCTTCCCAGGTAACAAACCAACCAACTTTCGATCTCTGTAGATCTGTTCTCTAAACGAAC<br>TTCTCTGATATCTTCAGTTTGTGTC  | PCR #1       |
|                                         |        |                                                                                                                                       |              |
| pSARS-CoV-2<br>5'UTR-ORF-N<br>Renilla   | PCR #1 | TGTAGATCTGTTCTCTAAACGAACAACATAAATGTCTACTTCGAAAGTTTATGATCCAG<br>TTCTCTGATATCTTCAGTTTGTGTC                                              | pGlo-Renilla |
|                                         | PCR #2 | TAAGCAGGATCCTAATACGACTCACTATAGATTAAGGTTTATACCTTCCCAGGTAACAAACCAACCAACTTTCGATCTCTGTAGATCTGTTCTCTAAACGAAC<br>TTCTCTGATATCTTCAGTTTGTGTC  | PCR #1       |

**Table S2.** List of primers used for the cloning of the different 5'UTRs of the SARS-CoV-2 gRNA and sgRNAs

| Constructs                                   | # PCR    | 5'-3' Primers                                                                                                                 | Template                                     |
|----------------------------------------------|----------|-------------------------------------------------------------------------------------------------------------------------------|----------------------------------------------|
| pSARS-CoV-2<br>5'UTR_Renilla<br>Mut-AUG-uORF | PCR #1.1 | TAAGCAGGATCCCTCGAGTAATACGACTCACTATAGATTAAGGTTTATACCTTCCCAGGT<br>AAGCAGCCGAGTGACAGCCACACAGATTTTAAAGTTCGTTAGAGAACAGATCTAC       | pSARS-CoV-2_5'UTR <sup>ORF1ab</sup> _Renilla |
|                                              | PCR #1.2 | TGTGTGGCTGTCACTCGGCTGCTTGCTTAGTGCACCTACGCAG<br>ACATCAGGATCCATCTTACCTTTCGGTCACACCC                                             | pSARS-CoV-2_5'UTR <sup>ORF1ab</sup> _Renilla |
|                                              | PCR 2    | TAAGCAGGATCCCTCGAGTAATACGACTCACTATAGATTAAGGTTTATACCTTCCCAGGT<br>ACATCAGGATCCATCTTACCTTTCGGTCACACCC                            | PCR #1.1 and PCR #1.2                        |
|                                              |          |                                                                                                                               |                                              |
|                                              |          |                                                                                                                               |                                              |
| pSARS-CoV-2<br>5'UTR_Renilla<br>uORF-phase   | PCR #1.1 | TAAGCAGGATCCCTCGAGTAATACGACTCACTATAGATTAAGGTTTATACCTTCCCAGGT<br>GTAA TTATA TTGTAA TTATACTGCGTGAGTGC ACTAAGCATG                | pSARS-CoV-2_5'UTR <sup>ORF1ab</sup> _Renilla |
|                                              | PCR #1.2 | AGTATAATTACAATATAATTACTGTCTGTGACAGGACACGAG<br>ACATCAGGATCCATCTTTCCTTTCGGACACACCCGGAC                                          | pSARS-CoV-2_5'UTR <sup>ORF1ab</sup> _Renilla |
|                                              | PCR 2    | TAAGCAGGATCCCTCGAGTAATACGACTCACTATAGATTAAGGTTTATACCTTCCCAGGT<br>ACATCAGGATCCATCTTTCCTTTCGGACACACCCGGAC                        | PCR #1.1 and PCR #1.2                        |
|                                              |          |                                                                                                                               |                                              |
|                                              |          |                                                                                                                               |                                              |
| pMERS-CoV<br>5'UTR_Renilla<br>Mut-AUG-uORF   | PCR #1   | TCACTTCCCCTCGTTCTCTTGCGAACTTTGATTTTAACGAACCTAAATAAAAGCCCTGTTGTTAGCG<br>AGATGTAAAGCTTGCATAAATGTTAT                             | pMERS-CoV_5'UTR <sup>ORF1ab</sup> _Renilla   |
|                                              |          | TACGAAGGATCCTAATACGACTCACTATAGATTTAAGTGAATAGCTTGGCTATCTCACTTCCCCTCGTTCTCTTG<br>AGATGTAAAGCTTGCATAAATGTTAT                     |                                              |
|                                              | PCR #3   | TAAAAGCCCTGTGTTTAGCGTATTGTGCACTTGCTGTTGGGATTGTGGCAATAATTTGCTGCTCATCTAGGCAGTGGACATTGCTCAACACTGGG<br>AGATGTAAAGCTTGCATAAATGTTAT | PCR #2                                       |
|                                              |          |                                                                                                                               |                                              |

**Table S3.** List of primers used for the cloning of the uORFs mutations
